# Supplementary material
Source: publisher site journal article supplement (http://www.degruyter.com/publication/journal_key/POLYENG/downloadAsset/POLYENG_Instructions_for_Authors.pdf)
Supplement: Supplementary file 1 [file POLYENG_Instructions_for_Authors.pdf]

## I. Editorial policy

*Journal of Polymer Engineering (JPE)* publishes reviews, original basic and applied research contributions as well as recent technological developments in polymer engineering. Polymer engineering is a strongly interdisciplinary field and papers published by *JPE* may span areas such as polymer physics, polymer processing and engineering of polymer-based materials and their applications. Significant contributions from related fields such as renewable energy, environmental engineering, automotive and aerospace, nanotechnology, photonics and optoelectronics, functional polymers and polymer-based materials for electrical and piezoelectrical, biological and medical, mechanical and optical applications are encouraged.

*Reviews* may be of a theoretical, experimental or practical nature, provided that they make a significant contribution to knowledge in the field. *Original articles* must present an accurate description of the research conducted and an objective discussion of the results. The editors and the publisher are committed to high quality standards and rapid handling of the peer review and publication processes. Manuscripts are independently reviewed by peers selected by the Editors. Decisions are reached as quickly as possible. *JPE* aspires to notify authors within six weeks from submission date. Accepted papers go through a proofing process and are promptly published online ahead-of-print as soon as they have been finally processed.

**Reviewers:** Authors may indicate names of reviewers whom they wish to be excluded from reviewing their manuscripts.

**Unpublished material:** Submission of a manuscript to *JPE* implies that the work described is not copyrighted, published or submitted elsewhere, except in abstract form. The corresponding author must ensure that all authors approve the manuscript before its submission to *JPE*.

**Anti-plagiarism policy:** *Journal of Polymer Engineering* strongly discourages plagiarism and related issues. Each manuscript submitted to *JPE* undergoes an anti-plagiarism check that determines the degree of similarity with contents already published under any form. The Editors reserve the right to reject without reviewing manuscripts with high plagiarism content, or manuscripts that clearly appear to belong to a sequence of very similar works that add no or little scientific value. See also the [Publication Ethics and Malpractice Statement](#) on the journal's website.

**Copyright:** Manuscripts are accepted on condition of transfer of copyright (for U.S. government employees: to the extent transferable) to *JPE*. Once the manuscript is accepted, it may not be published elsewhere without the consent of the copyright holders.

## II. Submission of manuscripts

Manuscripts must be submitted online at:

<https://mc.manuscriptcentral.com/jpolveng>

## III. Preparation of manuscripts

### Cover letter

Each manuscript should be accompanied by a cover letter containing a brief statement by the authors as to the focus, subject area and novelty of their article.

### Language

Manuscripts should be written in clear and concise English. Please have your text proofread by a native English speaker before you submit it for consideration. The Editors reserve the right to directly reject a manuscript if its language is insufficient.

### General format and length

Formatting should be kept to a minimum. Do not create headers or footers, page breaks or arrange your text with the space key. Include page numbers. Please avoid footnotes in the text, use parentheses instead. **Original articles should not exceed 6000 words (title page, main text, references, and figure captions). The total number of Figures and Tables must not exceed 10 (example, 4 Figures and 6 Tables).** There is no page limit on *Reviews*.

### Nomenclature and units

Please refer to the IUPAC Nomenclature for Organic Chemistry ([www.iupac.org](http://www.iupac.org)). Chemical names, abbreviations and acronyms should be given in parentheses at the first appearance in the text. Well-known procedures/reactions should be designated by name, and appropriate literature references should be given.

Please use the International System of Units (SI). Temperatures should be given in °C. The unit 'billion' ( $10^9$  in America,  $10^{12}$  in Europe) is ambiguous and should be avoided. Axes for graphs and headings for tables should be given in quantity calculus form, e.g. times as  $t$  (s), potential as  $E$  (mV vs. SHE), current density as  $i$  (mA/cm<sup>2</sup>).

### Manuscript structure

Title page, abstract (max. 200 words), keywords (max. 5), main text, acknowledgments, research funding information, conflict of interest statement, references list, figure captions.

All section headings of the main text/body must be numbered consecutively. Abbreviations should be explained at first mention in the text/body, thereafter the abbreviations should be used only. A list of non-standard abbreviations should be included if there are more than 10. A nomenclature list at the end of the paper is recommended when many symbols are included in the text. Equations must be clearly printed and numbered sequentially with Arabic numbers enclosed with round parentheses at the right-hand margin.

### References

The journal uses **ACS Numbered style**. Pls apply the rules as outlined in the **reference style sheet at the end of this document**. Thank you.

### Tables

Submit tables on separate pages and number them consecutively using Arabic numerals. Provide a short descriptive title, column headings, and (if necessary) footnotes to make each table self-explanatory. Refer to tables in the text as Table 1, etc. Use Table 1, etc. in the table legends.

### Figures

**General requirements:** Do not embed figures within the text body of the manuscript; submit figures in separate files (eps or tif format) and with a high enough resolution. All illustrations must be of reproduction-ready quality. They will be reduced in size to fit, whenever possible, the width of a single column. Lettering of all figures within the article should be uniform in style (preferably a sans serif typeface like Helvetica) and of sufficient size (ca. 8 pt.). Uppercase letters A, B, C, etc. should be used to identify parts of multi-part figures. Cite all figures in the text in numerical order.

**Halftone figures (grayscale and color)** should have a minimum resolution of 300 dpi and be of good contrast. Authors are encouraged to submit illustrations in color if necessary for their scientific content. Publication of color figures is provided free of charge both in online and print editions.

**Line drawings** must be of reproduction-ready quality. Please note that faint shading may be lost upon reproduction. When drawing bar graphs, use patterning instead of grayscales. Lettering of all figures should be uniform in style. A resolution of 1200 dpi is recommended.

**Figure legends:** Provide a short descriptive title and a legend to make

each figure self-explanatory on separate pages. Explain all symbols used in the figures. Remember to use the same abbreviations as in the text body.

#### Use of third-party material/copyright permissions

It is the authors' responsibility to obtain permission to reproduce original or modified material that has been previously published. Copyright permissions can be obtained through the Copyright Clearance Center ([www.copyright.com](http://www.copyright.com)).

#### IV. Proofing and publication

##### Proof for correction

Authors of accepted papers will receive a proof for correction. At proof stage, only minor changes other than corrections of printers' errors are allowed. As per De Gruyter policy, no author list changes are permitted after acceptance of an article. The De Gruyter production team is instructed to enforce this policy during the production/proofing process.

##### Open access publication

De Gruyter offers open access publication (<https://www.degruyter.com/page/2013?language=en>). At proof stage, authors are informed about this option.

#### Offprints

The electronic files of typeset articles in Adobe Acrobat PDF format are provided free of charge; corresponding authors receive notification that their article has been published online.

#### Note for authors of NIH-funded research

De Gruyter acknowledges that the author of a US-agency-funded article retains the right to provide a copy of the final manuscript to agency upon acceptance for publication or thereafter, for public archiving in PubMed Central 12 months after publication in *JPE*. Note that only the accepted author's version of the manuscript, not the PDF file of the published article, may be used for NIH archiving.

#### Contact

Editorial Office *Journal of Polymer Engineering*  
De Gruyter  
Genthiner Str. 13  
10785 Berlin, Germany  
Tel. +49-30-26005-279  
E-mail: [polyeng.editorial@degruyter.com](mailto:polyeng.editorial@degruyter.com)  
<https://www.degruyter.com/polyeng>

## ACS (Numbered) Reference Style

| In-text citation           |                                                                                                                                                                    |
|----------------------------|--------------------------------------------------------------------------------------------------------------------------------------------------------------------|
| Single reference           | [1]                                                                                                                                                                |
| Series of references       | [2, 8, 25]                                                                                                                                                         |
| Range of references        | [5–12]                                                                                                                                                             |
| Citation order             | Sequential                                                                                                                                                         |
| Issue number               | Not allowed                                                                                                                                                        |
| Reference list             |                                                                                                                                                                    |
| Reference type             | Example                                                                                                                                                            |
| Reference list label       | Numbered without square bracket                                                                                                                                    |
| Author initials            | Abbreviated                                                                                                                                                        |
| 1. Journal                 | 1. Jeannot M. A., Cantwell F. F. Solvent microextraction into a single drop.<br><i>Anal. Chem.</i> 1996, 68, 2236–2240.<br>[Article title allowed, not mandatory.] |
| 2. Journal with supplement | 2. Yuan M., Liu H. The economic consequences of fair value accounting.<br><i>Account. Econ. Law</i> 2011, 1(Suppl. 2), 1–42.                                       |
| 3. Collaboration           | 3. American Society of Brewing Chemists. <i>Methods of Analysis</i> , 8th ed.; Springer: London, 1992.                                                             |

|                                                |                                                                                                                                                                                                                                                                                                                                                                                       |
|------------------------------------------------|---------------------------------------------------------------------------------------------------------------------------------------------------------------------------------------------------------------------------------------------------------------------------------------------------------------------------------------------------------------------------------------|
| 4. No et al. usage (all authors are listed)    | 4. Kaye K., Day R. D., Hair E. C., Moore K. A., Hadley A. M., Teixeira P. J., Helmschrott S., Massing N., Ackermann D., Yuan M. Parent marital quality and the parent-adolescent relationship: effects on sexual activity among adolescents and youth. <i>Marriage Fam. Rev.</i> 2009, 45, 270–288.                                                                                   |
| 5. Epub ahead of print                         | 5. Shah H. H., Stratz S., Hauser P. C. Electro-driven extraction across a polymer inclusion membrane in a flow-through cell. <i>J. Chromatogr. A</i> 2013, published ahead of print; doi: 10.1016/j.chroma.2013.01.062                                                                                                                                                                |
| 6. Reference – in press                        | 6. Tang D., Jankowiak R., Small G. J., Tiede D. M. Deepoxy T-2 tetrol: a metabolite of TO <sub>2</sub> toxin found in cow urine. <i>Chem. Phys.</i> , in press.                                                                                                                                                                                                                       |
| 7. Book/monograph                              | 7. Wertheimer A. I., Norris, J. <i>Chemometrics with R</i> ; Springer: London, 2011.                                                                                                                                                                                                                                                                                                  |
| 8. Book with edition                           | 8. King Lester S. <i>Why Not Say It Clearly: A Guide to Scientific Writing</i> , 2nd ed.; Little, Brown: Boston, MA, 1991.                                                                                                                                                                                                                                                            |
| 9. Edited book                                 | 9. Warren B. K., Oyama S. T., Eds. <i>The Chemistry of the Atmosphere: Oxidants and Oxidation in the Earth's Atmosphere</i> ; Royal Society of Chemistry: Cambridge, England, 1995.                                                                                                                                                                                                   |
| 10. Edited book with chapter title and editors | 10. Laidlaw I., Steinmetz M. Introduction to differential sedimentation. In <i>Analytical Ultracentrifugation: Techniques and Methods</i> ; Scott D. L., Harding S. E., Rowe A. J., Eds. Royal Society of Chemistry: Cambridge, 2005; pp. 270–290.                                                                                                                                    |
| 11. Edited book series                         | 11. Wiberg K. Guidelines for drinking water quality. In <i>Investigations Rates and Mechanisms Reactions</i> ; Lewis E. S., Ed.; <i>Techniques of Chemistry</i> , Vol. VI, 1974; p. 764.                                                                                                                                                                                              |
| 12. Proceedings/Conferences                    | 12. Harwood J. S. Direct detection of volatile metabolites produced by microorganisms. In <i>Proceedings of the 36th ASMS Conference on Mass Spectrometry and Allied Topics</i> , San Francisco, CA, June 5–10, 1988.                                                                                                                                                                 |
| 13. Electronic publication (Available at)      | <b>Available at/Retrieved from – text not allowed</b><br>13. Fine L. Einstein Revisited. <i>J. Chem. Educ.</i> [Online] 2005, 82, 1601 ff. <a href="http://jchemed.chem.wisc.edu/Journal/Issues/2005/Nov/abs1601.html">http://jchemed.chem.wisc.edu/Journal/Issues/2005/Nov/abs1601.html</a> (accessed Oct 15, 2005).                                                                 |
| 14. Electronic publication (Accessed)          | 14. Zloh M., Esposito D., Gibbons W. A. Helical net plots and lipid favourable surface mapping of transmembrane helices of integral membrane proteins: aids to structure determination of integral membrane proteins. <i>Internet J. Chem.</i> 2003, 6, Article 2. <a href="http://www.ijc.com/articles/2003v6/2/">http://www.ijc.com/articles/2003v6/2/</a> (accessed Oct 13, 2004). |

|                         |                                                                                                                                                                                                                         |
|-------------------------|-------------------------------------------------------------------------------------------------------------------------------------------------------------------------------------------------------------------------|
| 15. Thesis/Dissertation | 15. Cotruvo J. <i>Kinetic Model for Chlorophyll Degradation</i> . Ph.D. Thesis, Massachusetts Institute of Technology, Cambridge, MA, 1996.                                                                             |
| 16. Report              | 16. Tschantz B. A., Moran B. M. <i>Modeling of the Hydrologic Transport of Mercury in the Upper East Fork Poplar Creek (UEFPC) Watershed</i> ; Technical Report for Lockheed Martin Energy Systems: Bethesda, MD, 2004. |
| 17. Patent              | 17. Bernson S. W. Conversion of Methane. U.S. Patent 4,199,533, April 22, 1980.                                                                                                                                         |
| 18. Standards           | 18. <i>The Sadtler Standard Spectra: 300 MHz Proton NMR Standards</i> ; Bio-Rad, Sadtler Division: Philadelphia, PA, 1994; No. 7640 (1-Chloropentane), 2005.                                                            |
| 19. Computer Programs   | Author X., Author Y. PROGRAM TITLE (version or edition);<br>Publisher/University/Company: Place of Publication, Year.                                                                                                   |
